# Supplementary material
Source: PubMed Central journal article supplement (PMC5394306)
Supplement: AEM.03319-16_zam999117789s1.pdf [file AEM.03319-16_zam999117789s1.pdf]

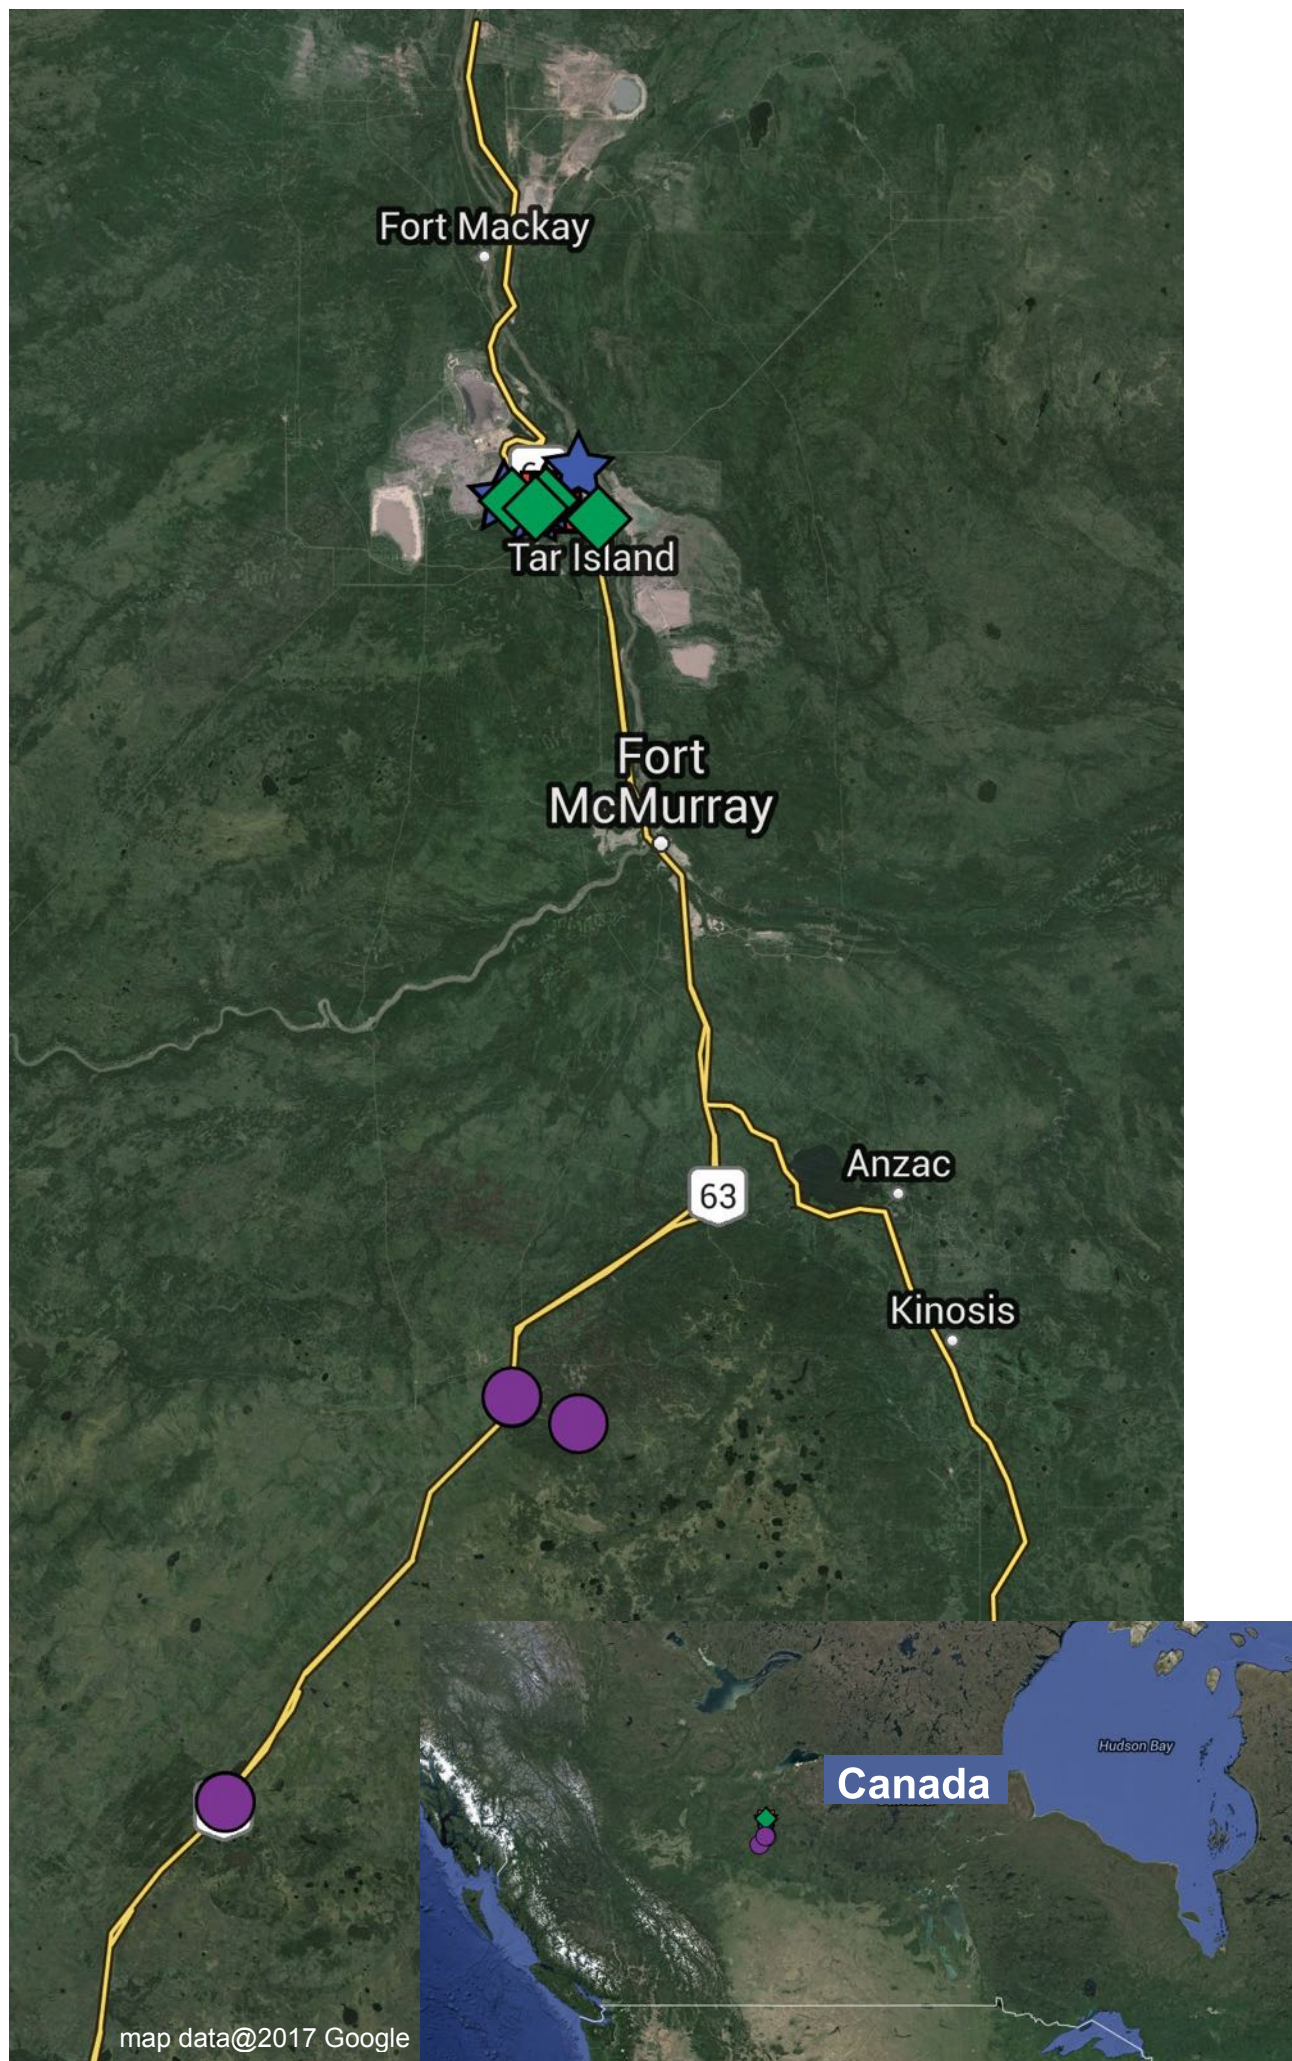

- Reconstructed planted with coniferous trees
- ★ Reconstructed planted with deciduous trees
- ◆ Reconstructed planted with grasses
- Natural

**Fig S1.** Map of sampling sites

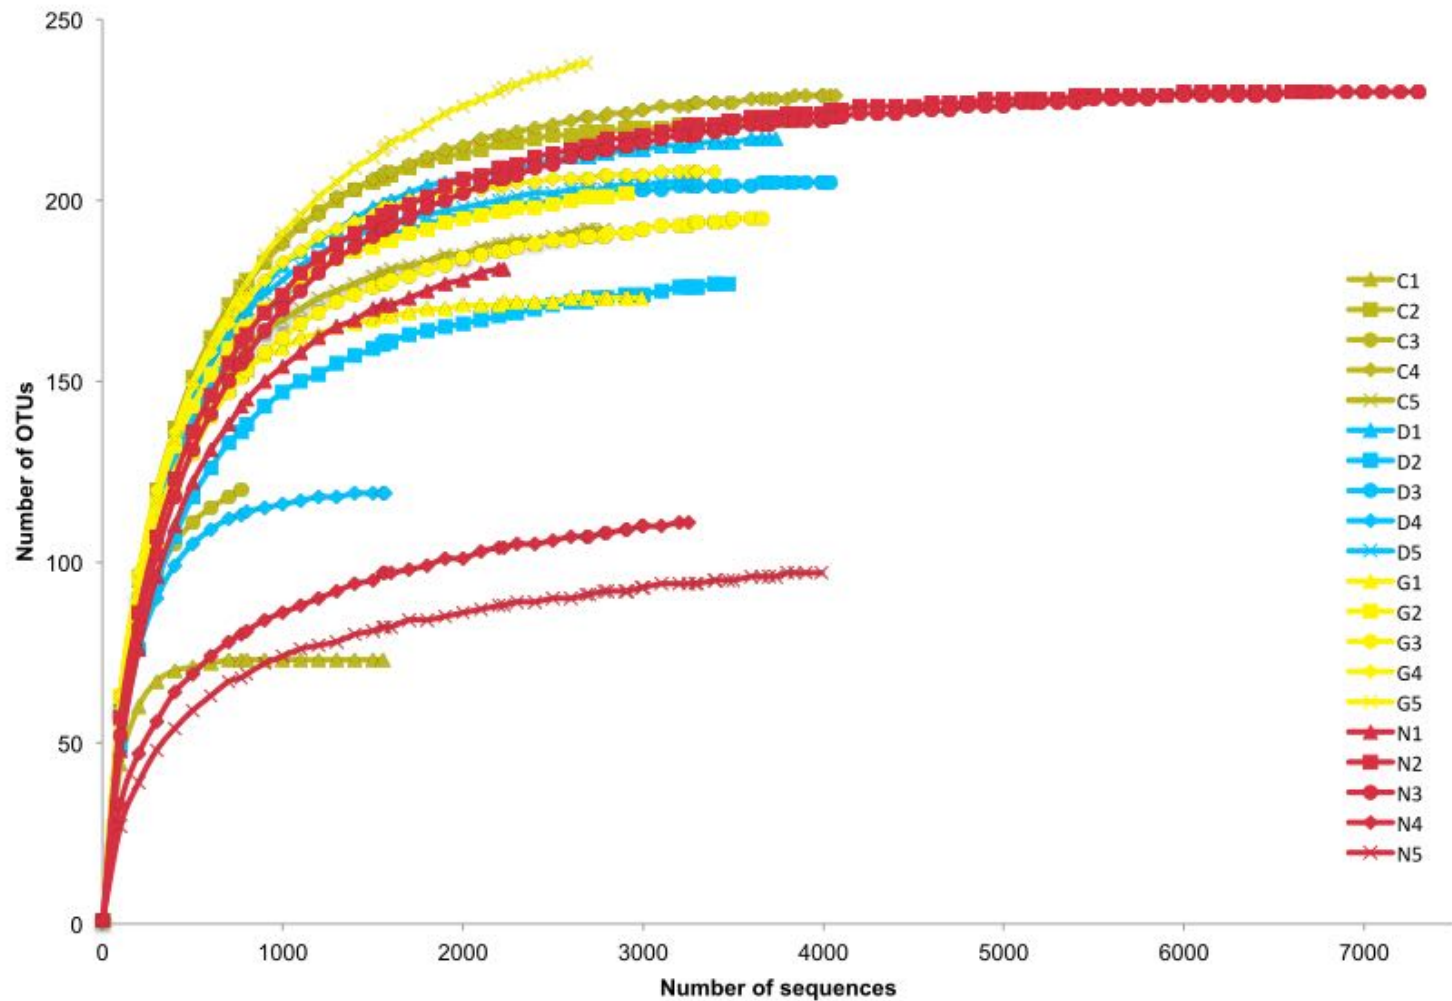

Fig S2. Rarefaction curves for reconstructed soils planted using coniferous species (C1 to C5), reconstructed soils planted using deciduous species (D1 to D5), reconstructed soils planted using grass species (G1 to G5) and in natural forest soils (N1 to N5)

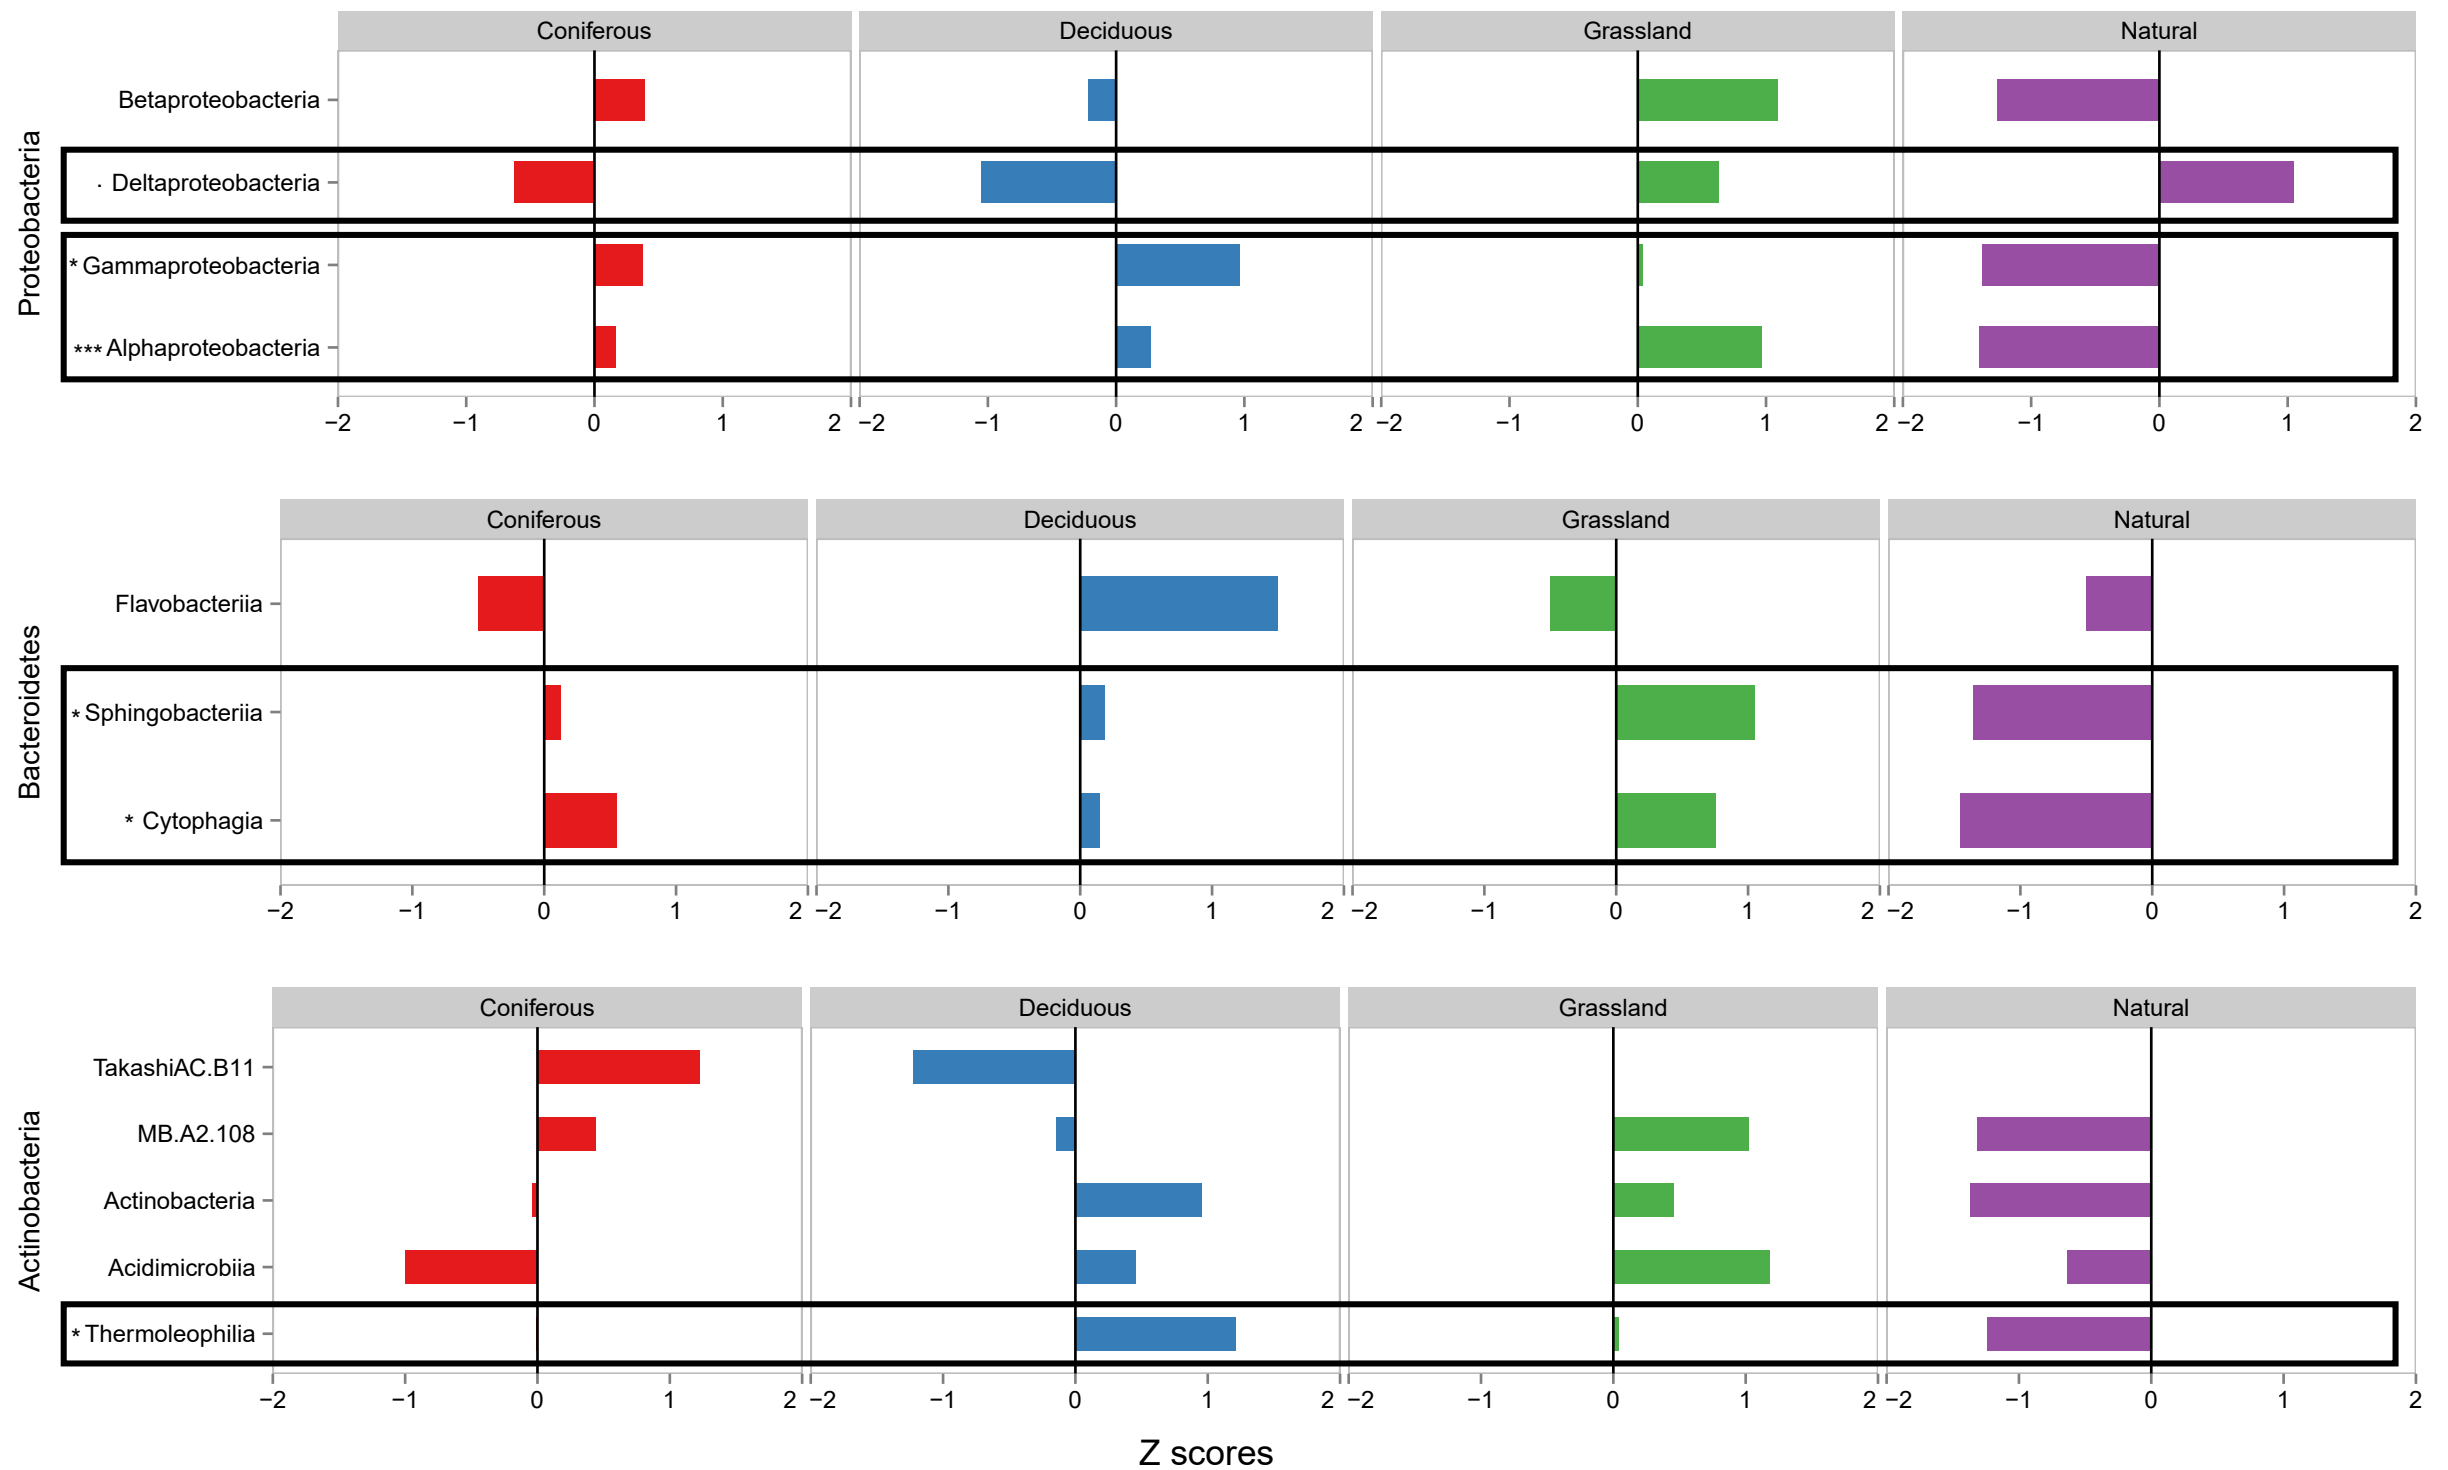

Fig S3. Z-scores of bacterial classes belonging to phyla more abundant in reconstructed soils ( $p < 0.001$ : \*\*\*;  $p < 0.01$ : \*\*;  $p < 0.05$ : \*,  $p < 0.1$ : .)

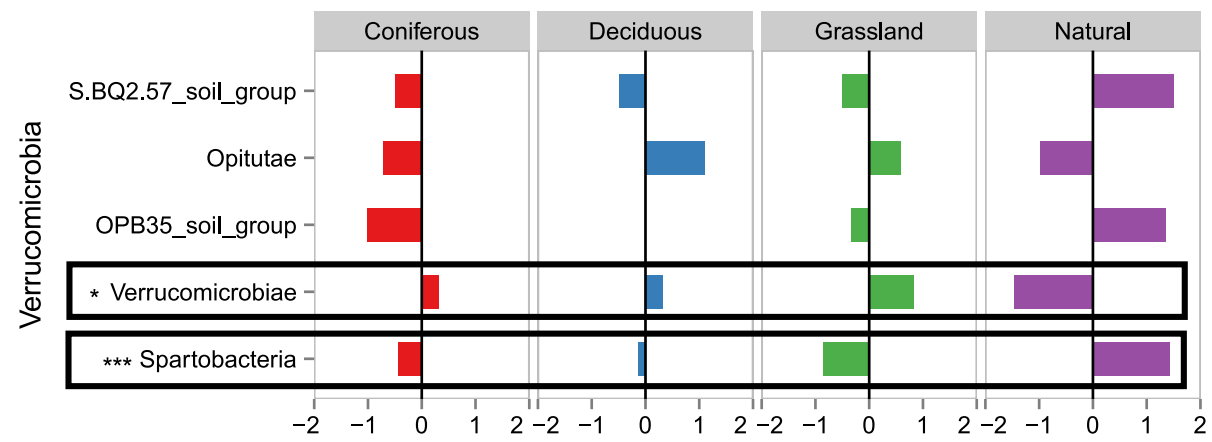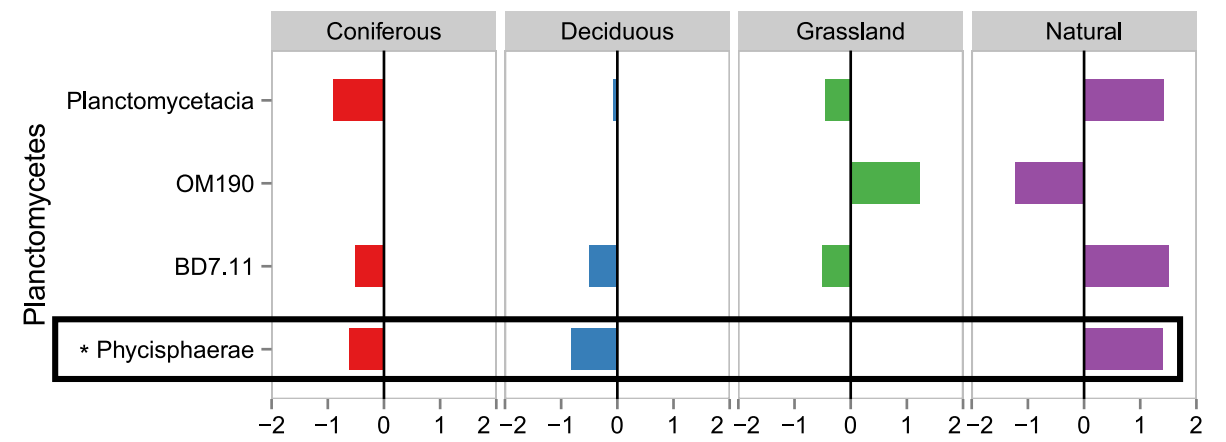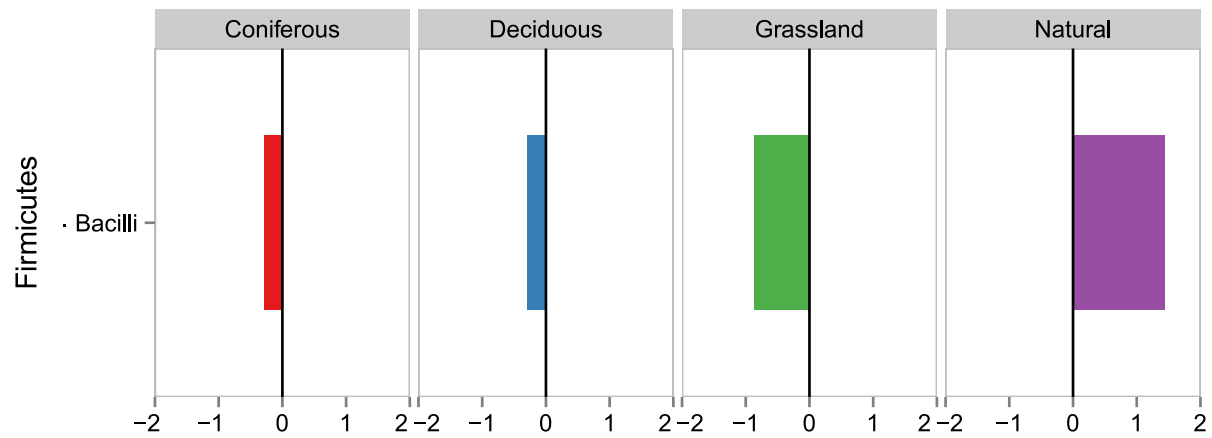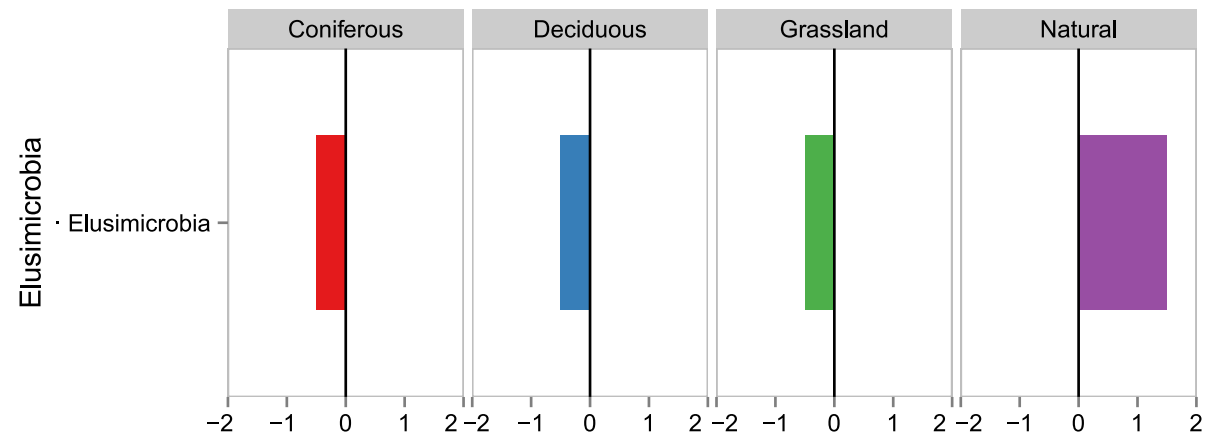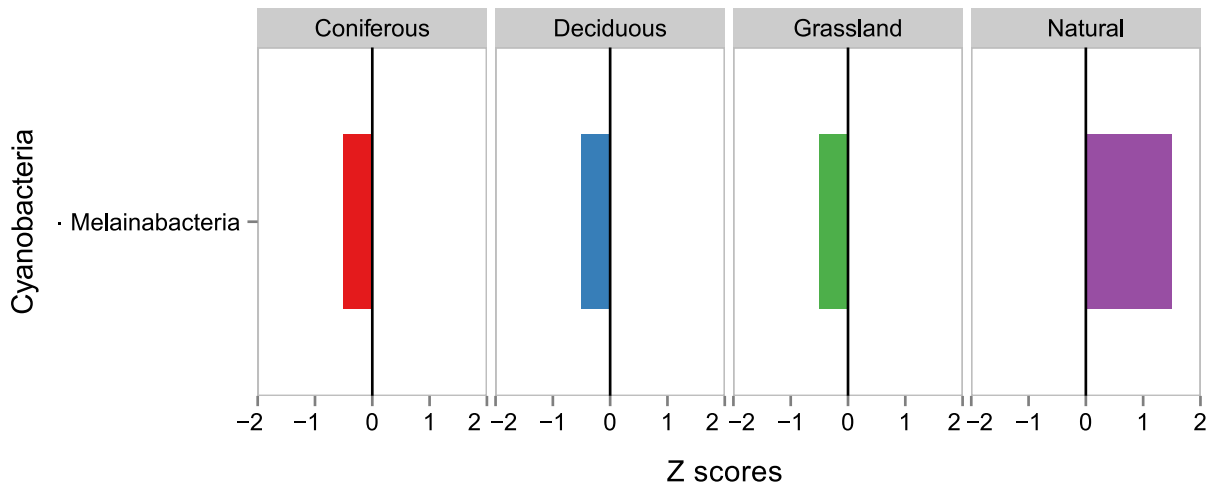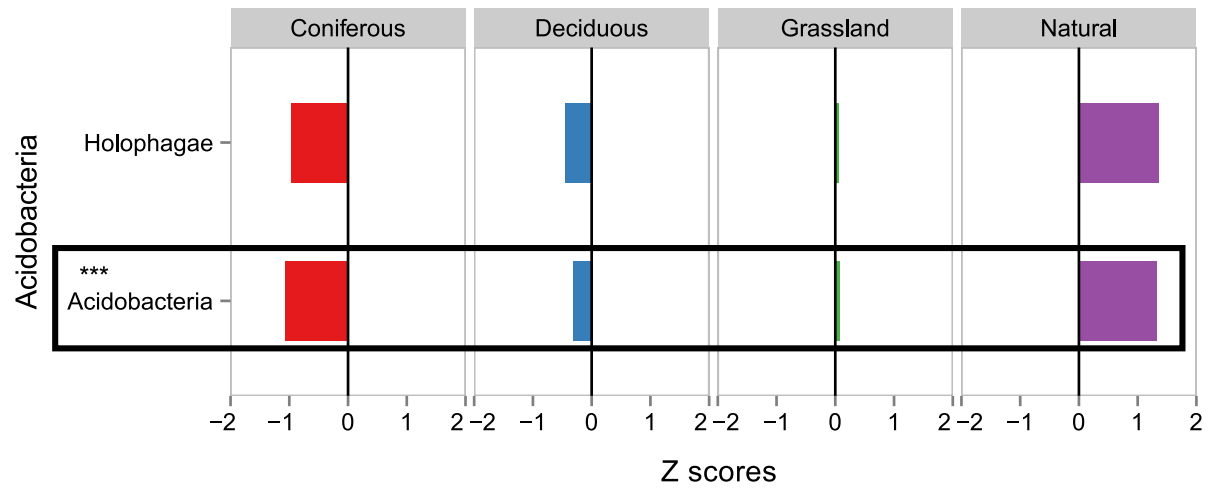

FIG S4 Z-scores of bacterial classes belonging to phyla more abundant in natural forest soils ( $p < 0.001$ :\*\*\*;  $p < 0.01$ : \*\*;  $p < 0.05$ :\*;  $p < 0.1$ : .)

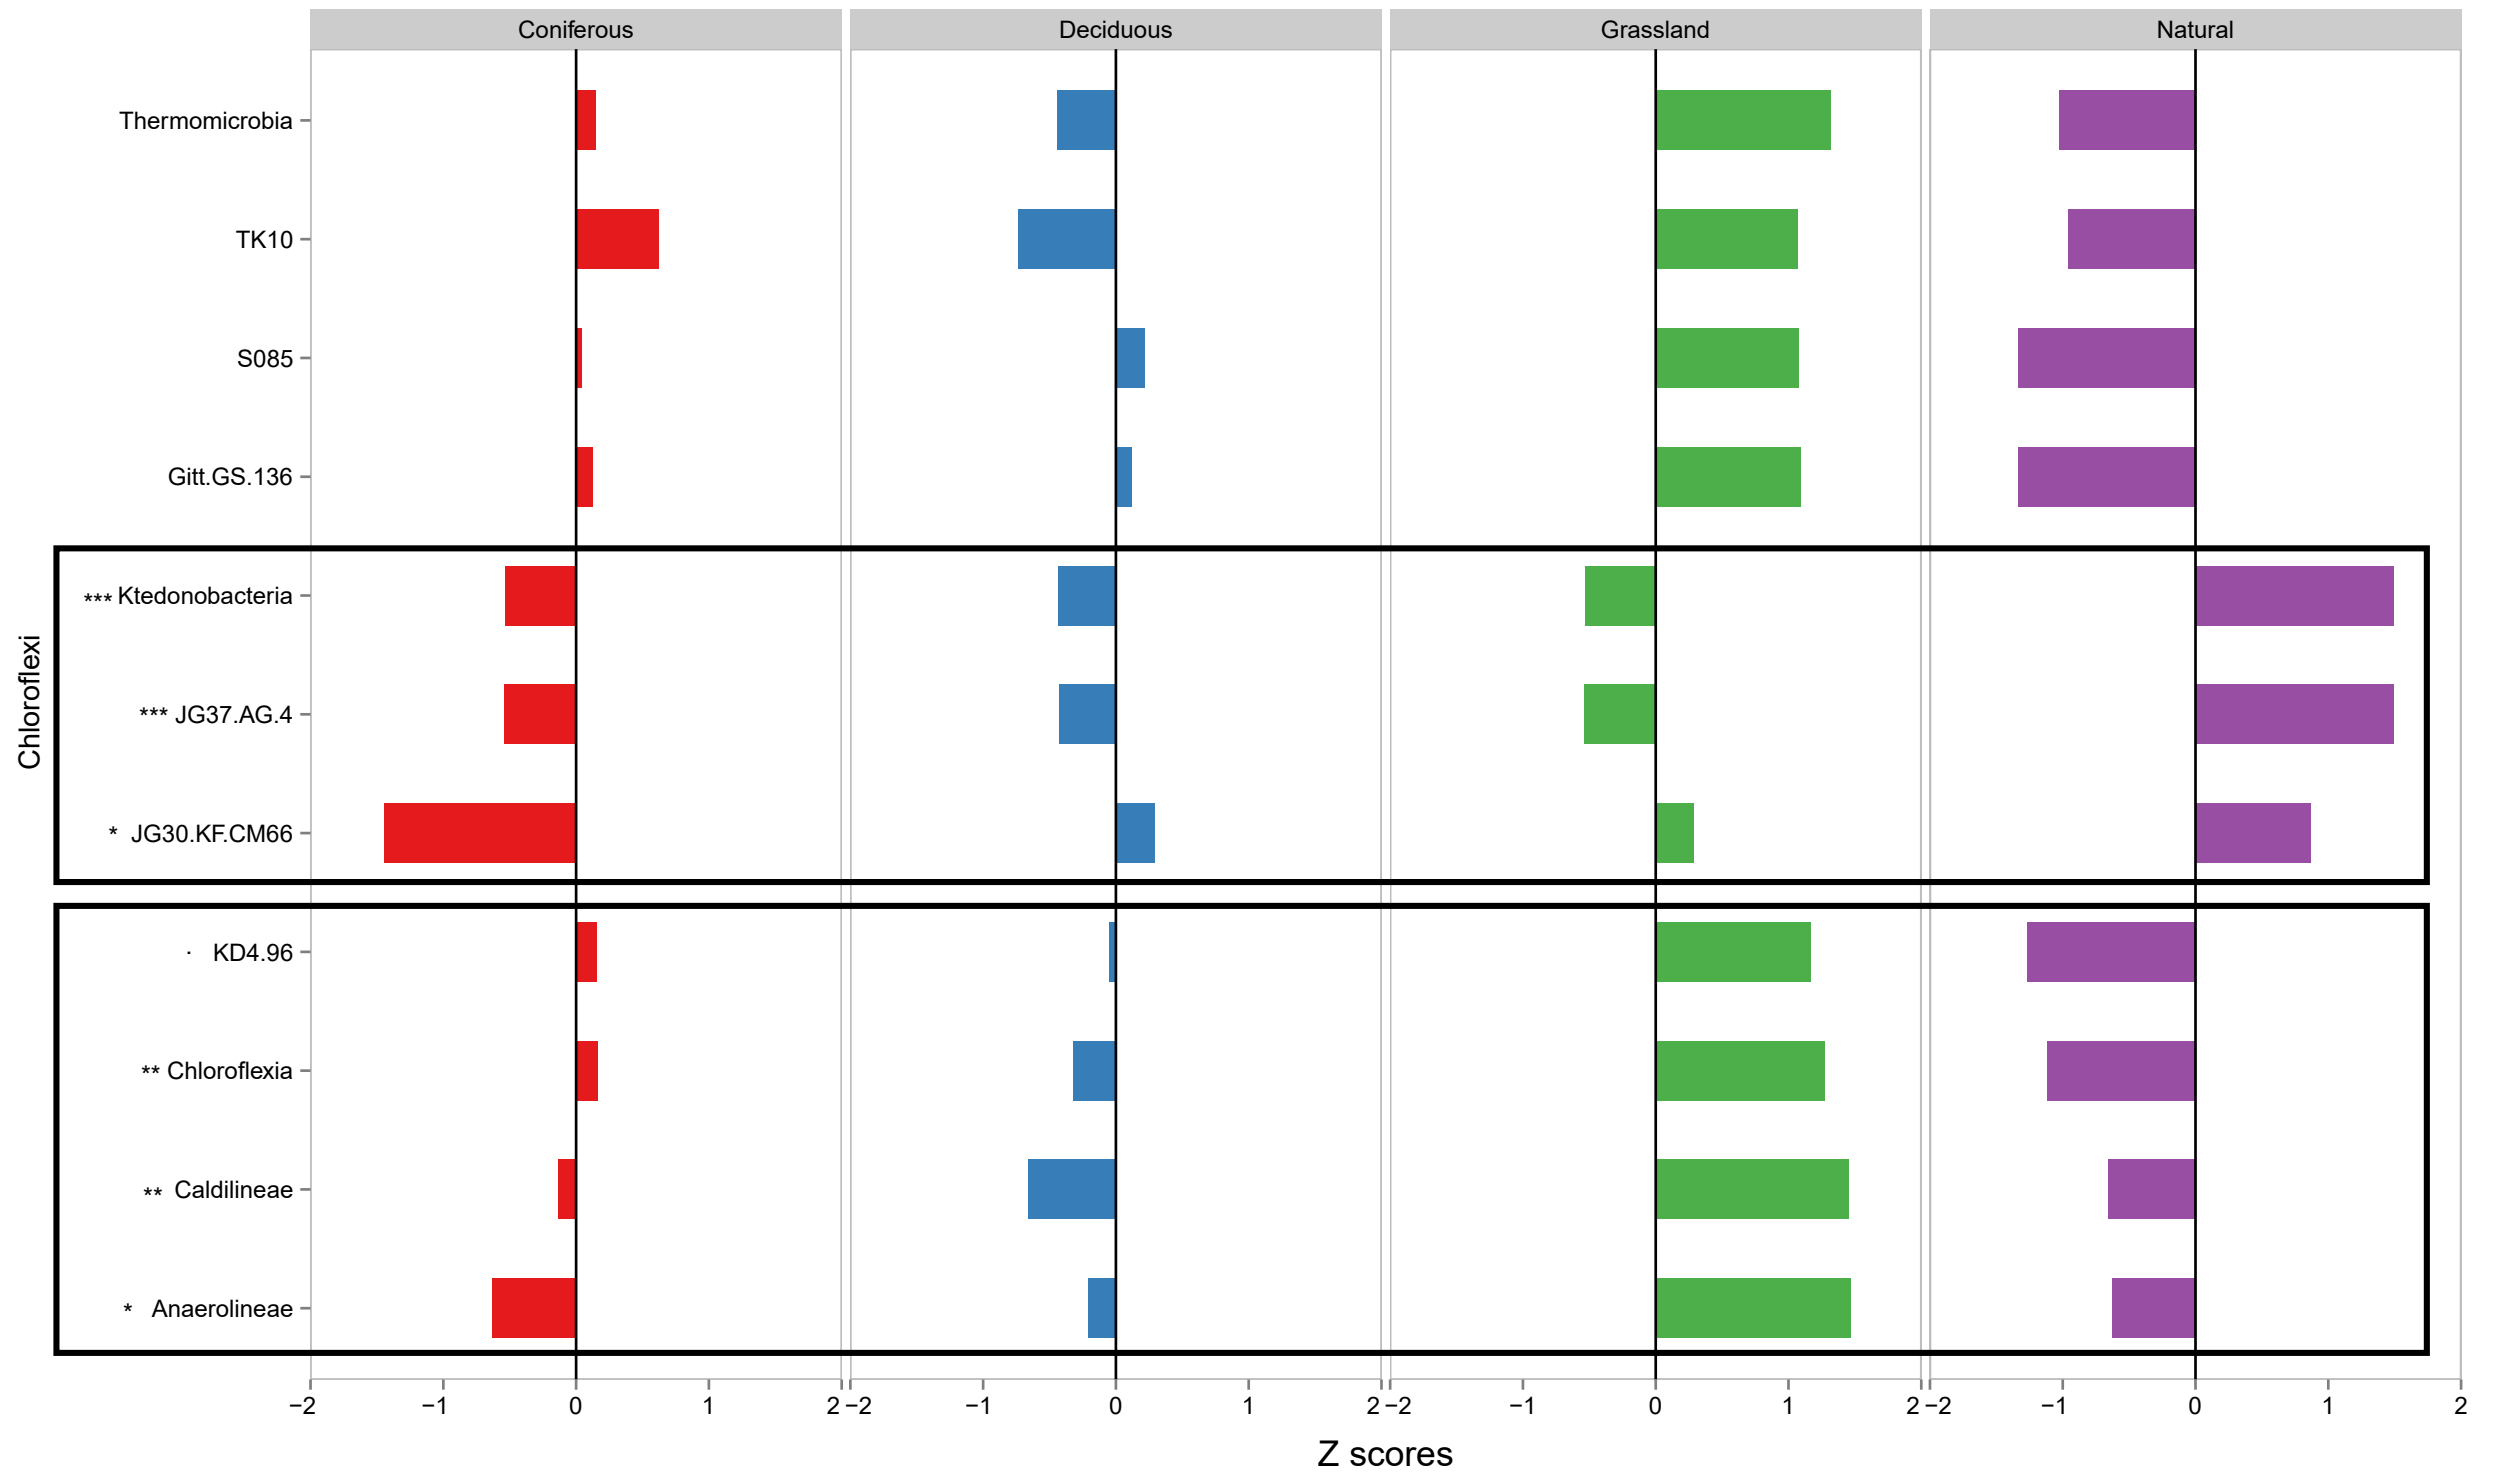

FIG S5 Z-scores of bacterial classes belonging to phyla more abundant in reconstructed soils planted with grasses (p<0.001: \*\*\*; p<0.01: \*\*; p<0.05:\*; p<0.1: .)

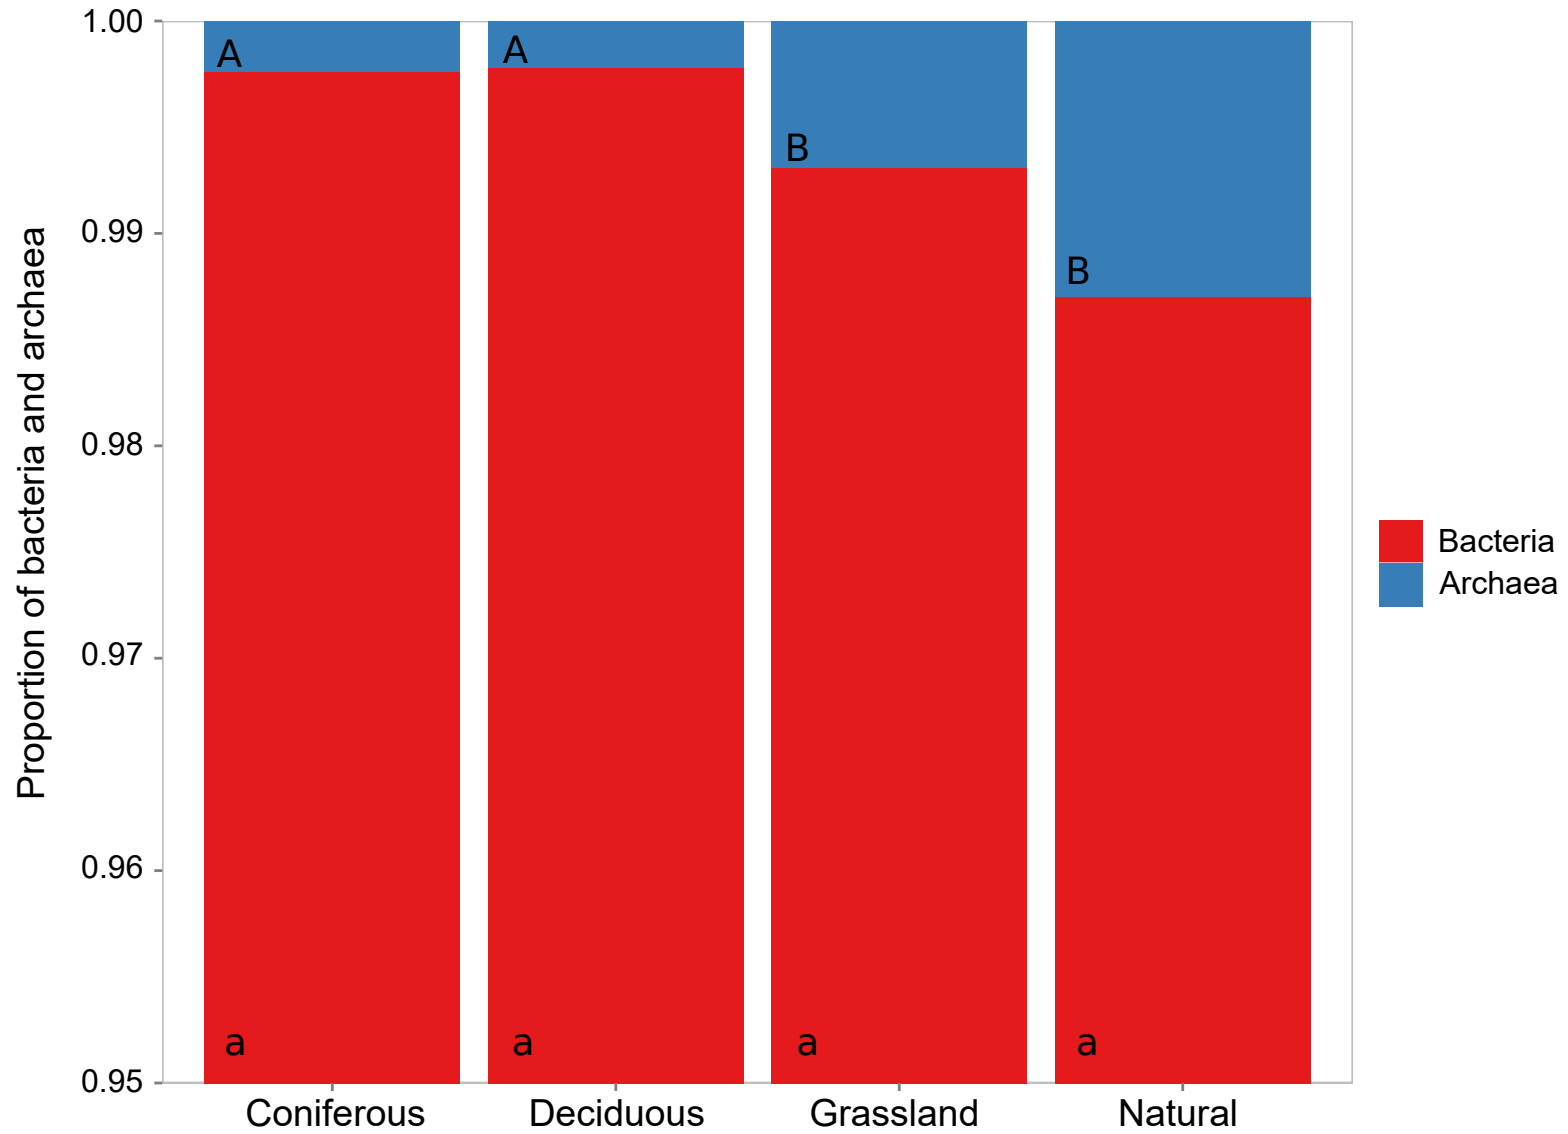

FIG S6 Relative abundance of bacterial and archaeal classes in the studied soils. Statistical differences among bacteria are identified with lower-case characters ( $p > 0.1$ ) and statistical differences among archaea are identified with upper-case characters ( $p < 0.01$ )



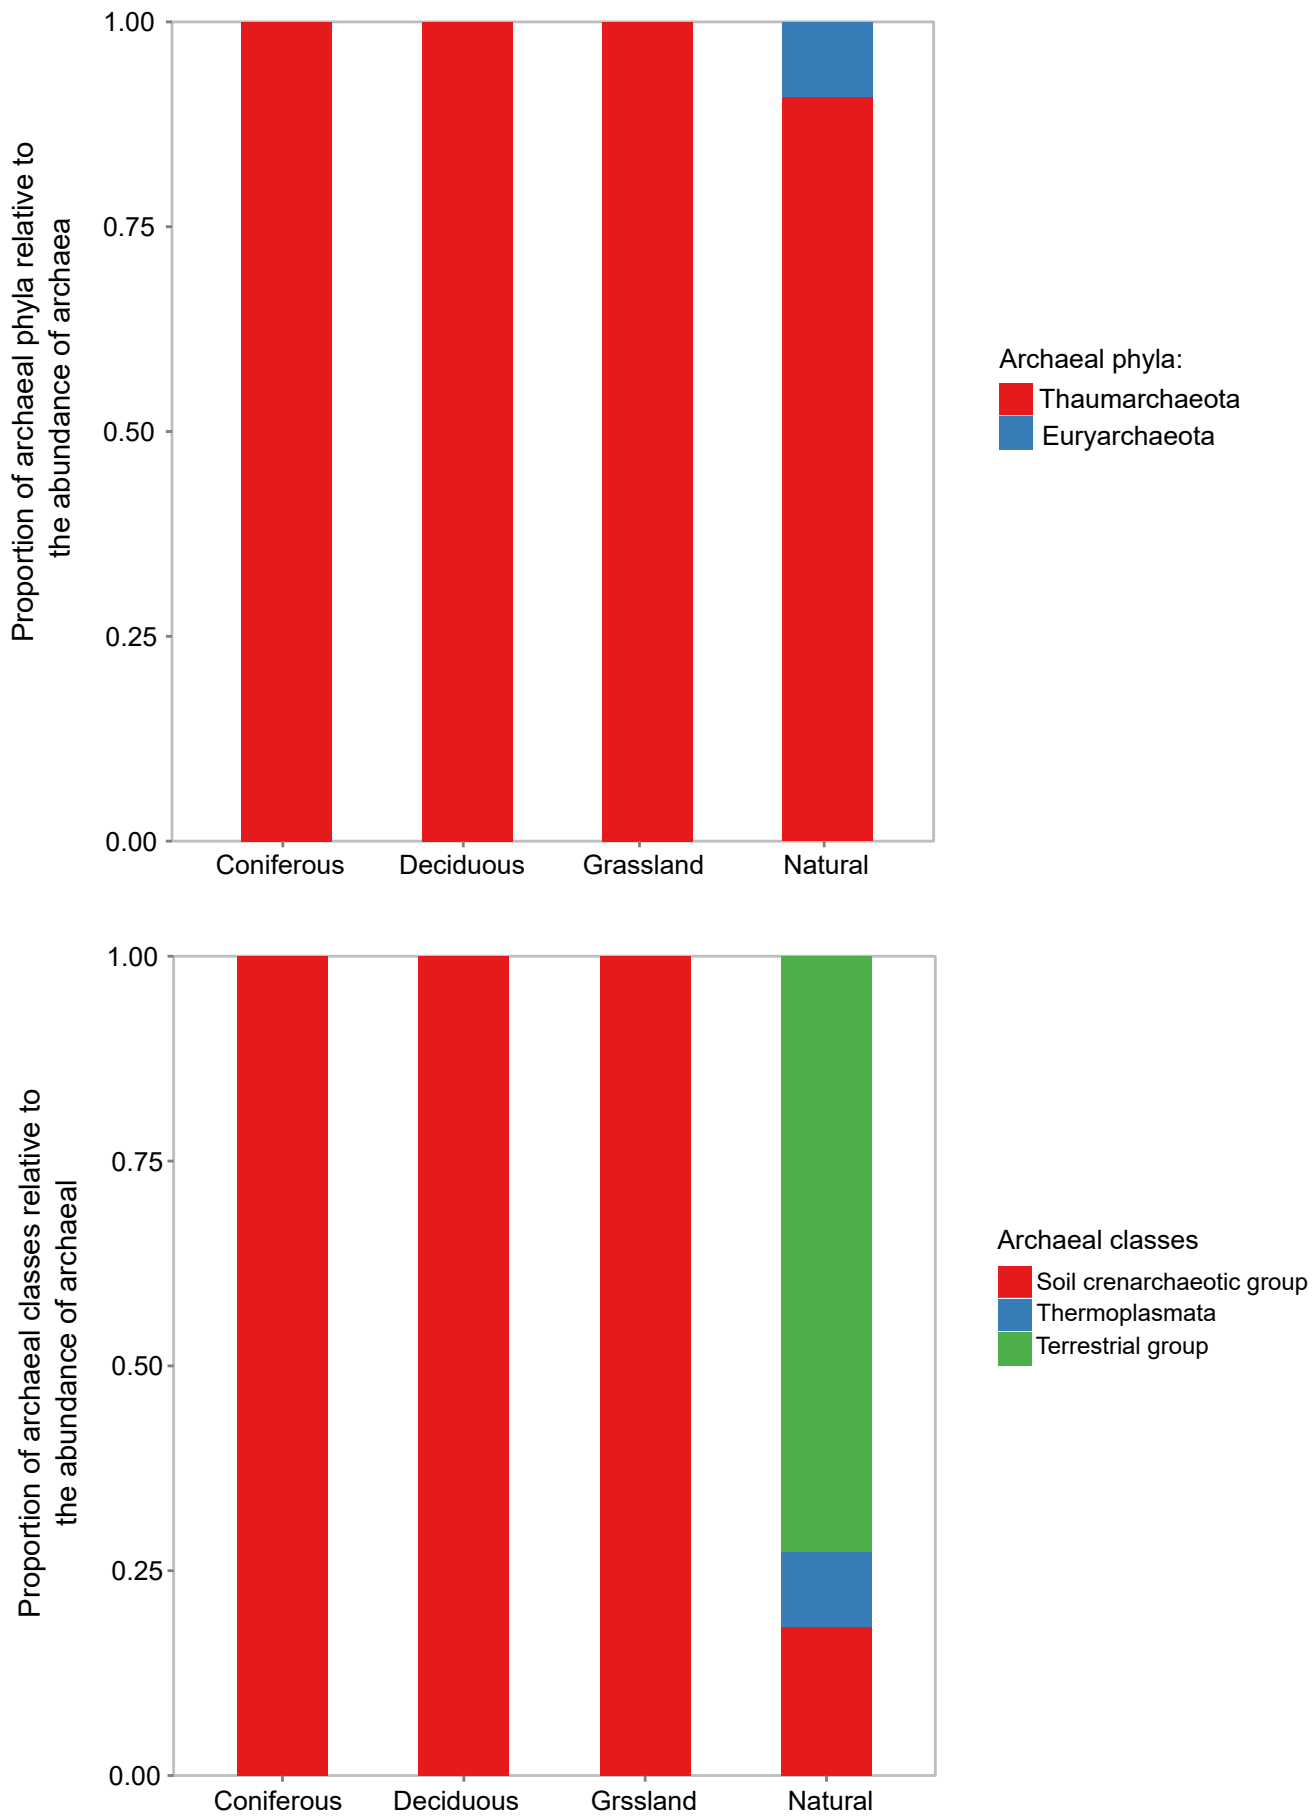

FIG S7 Relative abundance of archaeal phyla (top) and classes (bottom) in reconstructed soils planted using coniferous, deciduous and grass species and in natural forest soils.

**Table S1.** Number of sequences and OTU at each of the study sites

| Site                 | Original number of reads | Reads after quality trimming and alignment | OTU    |
|----------------------|--------------------------|--------------------------------------------|--------|
| Coniferous (mean±sd) | 34,646±2,068             | 13,456±1,219                               | 167±68 |
| C1                   | 28,066                   | 12,164                                     | 73     |
| C2                   | 31,026                   | 13,100                                     | 222    |
| C3                   | 10,802                   | 3,234                                      | 120    |
| C4                   | 34,838                   | 14,536                                     | 229    |
| C5                   | 34,547                   | 14,877                                     | 192    |
| Deciduous (mean±sd)  | 27,856±9,930             | 11,582±4,794                               | 185±39 |
| D1                   | 34,711                   | 12,357                                     | 217    |
| D2                   | 31,425                   | 12,084                                     | 177    |
| D3                   | 35,663                   | 14,934                                     | 205    |
| D4                   | 37,021                   | 13,657                                     | 119    |
| D5                   | 34,410                   | 14,247                                     | 205    |
| Grassland (mean±sd)  | 39,197±5,817             | 15,662±1,986                               | 203±23 |
| G1                   | 30,085                   | 13,860                                     | 173    |
| G2                   | 35,865                   | 14,119                                     | 202    |
| G3                   | 41,313                   | 15,588                                     | 195    |
| G4                   | 42,490                   | 15,906                                     | 208    |
| G5                   | 45,464                   | 18,838                                     | 238    |
| Natural (mean±sd)    | 45,644±5,976             | 24,753±4,107                               | 170±63 |
| N1                   | 39,957                   | 19,327                                     | 181    |
| N2                   | 40,293                   | 22,476                                     | 230    |
| N3                   | 44,740                   | 24,546                                     | 230    |
| N4                   | 53,823                   | 27,843                                     | 111    |
| N5                   | 49,405                   | 29,574                                     | 97     |



**Table S2.** F values, p values and significance level of one-way ANOVA testing differences in abundance of bacterial phyla among reconstructed soils planted using coniferous, deciduous and grass species and in natural forest soils \*\*\*p<0.001; \*\*p<0.01; \*p<0.05; . p<0.1, NS: not significant (p>0.1)

| Bacterial phyla        | F value | p value | Level of significance |
|------------------------|---------|---------|-----------------------|
| Acidobacteria          | 9.445   | 0.001   | ***                   |
| Actinobacteria         | 3.685   | 0.034   | *                     |
| Armatimonadetes        | 1.000   | 0.418   | NS                    |
| BHI80.139              | 1.000   | 0.418   | NS                    |
| Bacteroidetes          | 8.806   | 0.001   | **                    |
| Candidate_division_OD1 | 1.000   | 0.418   | NS                    |
| Candidate_division_WS3 | 2.447   | 0.101   | NS                    |
| Chloroflexi            | 3.072   | 0.058   | .                     |
| Cyanobacteria          | 4.269   | 0.021   | *                     |
| Elusimicrobia          | 2.667   | 0.083   | .                     |
| Firmicutes             | 2.858   | 0.070   | .                     |
| Gemmatimonadetes       | 0.717   | 0.556   | NS                    |
| Nitrospirae            | 0.907   | 0.460   | NS                    |
| Planctomycetes         | 4.549   | 0.017   | *                     |
| Proteobacteria         | 14.381  | 0.000   | ***                   |
| TM6                    | 1.000   | 0.418   | NS                    |
| Verrucomicrobia        | 2.997   | 0.062   | .                     |
| WD272                  | 6.598   | 0.004   | **                    |
| Unclassified           | 2.861   | 0.070   | .                     |

**Table S3.** F values, p values and significance of one-way ANOVA testing differences in abundance of bacterial classes among reconstructed soils planted using coniferous, deciduous and grass species and in natural forest soils (\*\*\*p<0.001; \*\*p<0.01; \*p<0.05; . p<0.1, NS: not significant (p>0.1))

| Bacterial classes              | F value | p value | Level of significance |
|--------------------------------|---------|---------|-----------------------|
| Acidobacteria                  | 9.570   | 0.001   | ***                   |
| Acidimicrobiia                 | 0.599   | 0.625   | NS                    |
| Actinobacteria                 | 2.042   | 0.148   | NS                    |
| Alphaproteobacteria            | 10.367  | 0.000   | ***                   |
| Anaerolineae                   | 3.782   | 0.032   | *                     |
| Bacilli                        | 2.858   | 0.070   | .                     |
| BD7.11                         | 1.000   | 0.418   | NS                    |
| Betaproteobacteria             | 1.932   | 0.165   | NS                    |
| Caldilineae                    | 7.569   | 0.002   | **                    |
| Chloroflexia                   | 6.283   | 0.005   | **                    |
| Chthonomonadetes               | 1.000   | 0.418   | NS                    |
| Cytophagia                     | 3.878   | 0.029   | *                     |
| Deltaproteobacteria            | 2.844   | 0.071   | .                     |
| Elusimicrobia                  | 2.667   | 0.083   | .                     |
| Flavobacteriia                 | 1.000   | 0.418   | NS                    |
| Gammaproteobacteria            | 4.806   | 0.014   | *                     |
| Gemmatimonadetes               | 0.717   | 0.556   | NS                    |
| Gitt.GS.136                    | 1.340   | 0.296   | NS                    |
| Holophagae                     | 1.921   | 0.167   | NS                    |
| JG30.KF.CM66                   | 3.265   | 0.049   | *                     |
| JG37.AG.4                      | 10.209  | 0.001   | ***                   |
| KD4.96                         | 2.948   | 0.064   | .                     |
| Ktedonobacteria                | 13.168  | 0.000   | ***                   |
| Melainabacteria                | 2.664   | 0.083   | .                     |
| Nitrospira                     | 0.907   | 0.460   | NS                    |
| OM190                          | 1.346   | 0.295   | NS                    |
| Opitutae                       | 1.357   | 0.292   | NS                    |
| Phycisphaerae                  | 5.137   | 0.011   | *                     |
| Planctomycetacia               | 1.680   | 0.211   | NS                    |
| S.BQ2.57 soil group            | 1.000   | 0.418   | NS                    |
| Spartobacteria                 | 6.815   | 0.004   | **                    |
| Sphingobacteriia               | 4.858   | 0.014   | *                     |
| TakashiAC.B11                  | 0.614   | 0.616   | NS                    |
| Thermoleophilia                | 3.456   | 0.042   | *                     |
| Thermomicrobia                 | 1.490   | 0.255   | NS                    |
| TK10                           | 1.220   | 0.335   | NS                    |
| unclassified                   | 6.695   | 0.004   | **                    |
| Verrucomicrobia Incertae Sedis | 1.001   | 0.418   | NS                    |
| Verrucomicrobiae               | 3.969   | 0.027   | *                     |

# Plant community, soil pH and nitrogen deposition as drivers of $\alpha$ - and $\beta$ -prokaryotic diversity in reconstructed soils and natural boreal forest soils

Masse J., Prescott, C.E., Renaut S., Terrat, Y., Grayston S.J.

## Bioinformatic script using Mothur

```
###July 17th 2015
##Treatment of sequences using mothur
##Author: Jacynthe Masse
##Last update: December 3rd 2015
##Done using this tutorial: http://www.mothur.org/wiki/MiSeq\_SOP

#Make contigs (using a doc txt have the forward and reverse sequences
for each sample)
make.contigs(file=StabilityFile, processors=4)

#Screening sequences to keep only sequences shorter than 500 bp and
without any ambiguity
screen.seqs(fasta=MI.M00833_0252.001.FLD0289.Micro--Com-
_007_SG_R1.trim.contigs.fasta, group=MI.M00833_0252.001.FLD0289.Micro--
Com-_007_SG_R1.contigs.groups, maxambig=0, maxlength=500)

#####Go to qiime for one step #####

##I've combined the fasta files with qiime #####
add_qiime_labels.py -m map16S.txt -i FastaToMerge -c InputFileName -o
combined_seq_fasta

##You'll need to create a folder "FastaToMerge" with all the fasta you
want to merge

##Change the name of the combined_seq_fasta to combined_seq.fasta

#####Go back to mothur #####

#####Pre-treatment #####

##Running unique sequences on the combined fasta; this reduced the time
needed for analyses and creates a .name file:
unique.seqs(fasta=combined_seqs.fasta)

##Outputs:
#combined_seqs.names
#combined_seqs.unique.fasta

##Running a count.seqs. This will create a table file that will be used
for subsequent analysis
##To create a count file with group. You first need to take your names
file and associate a group to each sequences
count.seqs(name=combined_seqs.names, group=combined_seqs.groups,
processors=4)
```

```
##It took 8 secs to create a table for 871,743 sequences
##Output: combined_seqs.count_table
```

```
summary.seqs(fasta=combined_seqs.unique.fasta,
count=combined_seqs.count_table)
```

### ##Aligned sequences

```
##I used silva (complete) reference database
###Again we can make our lives a bit easier by making a database
#customized to our region of interest
#(V4 here) using the pcr.seqs command. To run this command you need to
have the reference database (silva.bacteria.fasta) and know where in
that alignment your sequences start and end.
# To remove the leading and trailing dots we will set keepdots to
false. You could also run this command using your primers of interest.:
```

```
pcr.seqs(fasta=silva.nr_v119.align, start=11894, end=25319, keepdots=F,
processors=4)
```

```
##Output
```

```
### silva.nr_v119.pcr.align
```

```
#I renamed silva.nr_v119.pcr.align to silva.nr_v119.V4.align
```

```
align.seqs(fasta=combined_seqs.unique.fasta,
reference=silva.nr_v119.V4.align, flip=T, processors=4)
```

```
#It took 3762 secs to align 757592 sequences
```

```
#Outputs:
```

```
###combined_seqs.unique.align,
###combined_seqs.unique.align.report;
###combined_seqs.unique.flip.accnos
```

```
summary.seqs(fasta=combined_seqs.unique.align,
name=combined_seqs.names, processors=4)
```

### ##Screen sequences in order to remove the sequences that were not #aligned correctly

```
screen.seqs(fasta=combined_seqs.unique.align,
count=combined_seqs.count_table, summary=combined_seqs.unique.summary,
start=1, end=13424, maxhomop=10, processors=4, minlength=290,
maxlength=293)
```

```
#It took 285 secs to screen 757592 sequences.
```

```
###combined_seqs.unique.good.summary
###combined_seqs.unique.good.align
###combined_seqs.unique.bad.accnos
###combined_seqs.good.count_table
```

```
summary.seqs(fasta=combined_seqs.unique.good.align,
count=combined_seqs.good.count_table, processors=4)
```

```
###Filter sequences.
```

```
##Now we know our sequences overlap the same alignment coordinates, we
##want to make sure they only overlap that region. So we'll filter the
##sequences to remove the overhangs at both ends. Since we've done
##paired-end sequencing, this shouldn't be much of an issue, but
whatever. In addition, there are many columns in the alignment that
only contain gap characters (i.e. "-").
```

```
##These can be pulled out without losing any information.
filter.seqs(fasta=combined_seqs.unique.good.align, vertical=T, trump=.)
```

```
#Output:
####combined_seqs.filter
####combined_seqs.unique.good.filter.fasta
```

```
summary.seqs(fasta=combined_seqs.unique.good.filter.fasta,
count=combined_seqs.good.count_table, processors=4)
```

```
#seems good. The final alignment has 668 columns. We might have
#introduced some redundancy in the sequences now that we have trimmed
#the sequences.
```

```
unique.seqs(fasta=combined_seqs.unique.good.filter.fasta,
count=combined_seqs.good.count_table)
```

```
#Output
####combined_seqs.unique.good.filter.count_table
####combined_seqs.unique.good.filter.unique.fasta
```

```
summary.seqs(fasta=combined_seqs.unique.good.filter.unique.fasta,
count=combined_seqs.unique.good.filter.count_table)
```

```
##Let's remove more noise:
```

```
pre.cluster(fasta=combined_seqs.unique.good.filter.unique.fasta,
count=combined_seqs.unique.good.filter.count_table, diffs=2)
```

```
#Output:
####combined_seqs.unique.good.filter.unique.precluster.fasta
####All the .map files for each group
```

```
summary.seqs(fasta=current, count=current)
```

```
###The majority of the cluster had 1 sequence, which is likely to be an
##artefact from sequencing. So let's remove singletons
```

```
###Removing singletons from precluster
```

```
split.abund(fasta=combined_seqs.unique.good.filter.unique.precluster.fas
ta,
count=combined_seqs.unique.good.filter.unique.precluster.count_table,
cutoff=1)
```

```
## Outputs:
###combined_seqs.unique.good.filter.unique.precluster.rare.count_table
###combined_seqs.unique.good.filter.unique.precluster.abund.count_table
###combined_seqs.unique.good.filter.unique.precluster.rare.fasta
###combined_seqs.unique.good.filter.unique.precluster.abund.fasta
```

```
summary.seqs(fasta=combined_seqs.unique.good.filter.unique.precluster.abund.fasta,
count=combined_seqs.unique.good.filter.unique.precluster.abund.count_table, processors=4)
```

### ###Removing chimera

```
chimera.uchime(fasta=combined_seqs.unique.good.filter.unique.precluster.abund.fasta,
count=combined_seqs.unique.good.filter.unique.precluster.abund.count_table, dereplicate=t, processors=4)
```

```
*****make sure your count does have group information***
```

```
#Outputs:
```

```
###combined_seqs.unique.good.filter.unique.precluster.abund.uchime.pick.count_table
```

```
###combined_seqs.unique.good.filter.unique.precluster.abund.uchime.chimeras
```

```
###combined_seqs.unique.good.filter.unique.precluster.abund.uchime.accnos
```

```
#Running chimera.uchime with the count file will remove the chimeric sequences from the count file, but not from the fasta
```

```
remove.seqs(fasta=combined_seqs.unique.good.filter.unique.precluster.abund.fasta,
accnos=combined_seqs.unique.good.filter.unique.precluster.abund.uchime.accnos)
```

```
###combined_seqs.unique.good.filter.unique.precluster.abund.pick.fasta
```

```
summary.seqs(fasta=combined_seqs.unique.good.filter.unique.precluster.abund.pick.fasta,
count=combined_seqs.unique.good.filter.unique.precluster.abund.uchime.pick.count_table)
```

### ##Classify sequences

```
#As a final quality control step, we need to see if there are any "undesirables" in our dataset.
```

```
classify.seqs(fasta=combined_seqs.unique.good.filter.unique.precluster.abund.pick.fasta,
count=combined_seqs.unique.good.filter.unique.precluster.abund.uchime.pick.count_table, reference=silva.nr_v119.V4.align,
taxonomy=silva.nr_v119.tax, cutoff=80, processors=4)
```

```
#Output:
```

```
###combined_seqs.unique.good.filter.unique.precluster.abund.pick.nr_v119.wang.taxonomy
```

```
###combined_seqs.unique.good.filter.unique.precluster.abund.pick.nr_v119.wang.tax.summary
```

```
#Now that everything is classified we want to remove our undesirables.
```

```
#We do this with the remove.lineage command:
```

```
remove.lineage(fasta=combined_seqs.unique.good.filter.unique.precluster.abund.pick.fasta,
count=combined_seqs.unique.good.filter.unique.precluster.abund.uchime.p
```

```
ick.count_table,  
taxonomy=combined_seqs.unique.good.filter.unique.precluster.abund.pick.  
nr_v119.wang.taxonomy, taxon=Chloroplast-Mitochondria)
```

```
#Outputs:
```

```
###combined_seqs.unique.good.filter.unique.precluster.abund.pick.nr_v11  
9.wang.pick.taxonomy  
###combined_seqs.unique.good.filter.unique.precluster.abund.pick.pick.f  
asta  
###combined_seqs.unique.good.filter.unique.precluster.abund.uchime.pick  
.pick.count_table
```

```
summary.seqs(fasta=combined_seqs.unique.good.filter.unique.precluster.a  
bund.pick.pick.fasta,  
count=combined_seqs.unique.good.filter.unique.precluster.abund.uchime.p  
ick.pick.count_table)
```

```
##So there were 8 unique sequences (159 total sequences) that were  
##classify as chloroplast or mitochondria
```

```
#use lineage to remove mithochondria, chloroplast and unknown  
remove.lineage(fasta=combined_seqs.unique.good.filter.unique.precluster  
.abund.pick.fasta,  
count=combined_seqs.unique.good.filter.unique.precluster.abund.uchime.p  
ick.count_table,  
taxonomy=combined_seqs.unique.good.filter.unique.precluster.abund.pick.  
nr_v119.wang.taxonomy, taxon=Chloroplast-Mitochondria-unknown)
```

```
#Outputs:
```

```
###combined_seqs.unique.good.filter.unique.precluster.abund.pick.nr_v11  
9.wang.pick.taxonomy  
###combined_seqs.unique.good.filter.unique.precluster.abund.pick.pick.f  
asta  
###combined_seqs.unique.good.filter.unique.precluster.abund.uchime.pick  
.pick.count_table
```

```
summary.seqs(fasta=combined_seqs.unique.good.filter.unique.precluster.a  
bund.pick.pick.fasta,  
count=combined_seqs.unique.good.filter.unique.precluster.abund.uchime.p  
ick.pick.count_table)
```

```
#####Cluster sequences into OTU #####
```

```
## We can now cluster the sequences into OTUs to see how many OTUs we  
have:
```

```
dist.seqs(fasta=combined_seqs.unique.good.filter.unique.precluster.abun  
d.pick.pick.fasta, cutoff=0.20, processors=4)
```

```
#Output:
```

```
###combined_seqs.unique.good.filter.unique.precluster.abund.pick.pick.d  
ist
```



```
cluster(column=combined_seqs.unique.good.filter.unique.precluster.abund
.pick.pick.dist,
count=combined_seqs.unique.good.filter.unique.precluster.abund.uchime.p
ick.pick.count_table)
```

```
##Output:
###combined_seqs.unique.good.filter.unique.precluster.abund.pick.pick.a
n.unique_list.list
```

```
#To know how many sequences per OTU.
make.shared(list=combined_seqs.unique.good.filter.unique.precluster.abu
nd.pick.pick.an.unique_list.list,
count=combined_seqs.unique.good.filter.unique.precluster.abund.uchime.p
ick.pick.count_table, label=0.03)
```

```
##Outputs:
###combined_seqs.unique.good.filter.unique.precluster.abund.pick.pick.a
n.unique_list.shared
###combined_seqs.unique.good.filter.unique.precluster.abund.pick.pick.a
n.unique_list.12.rabund ***For all the samples
```

```
#To know the taxonomy for each of our OTUs.
classify.otu(list=combined_seqs.unique.good.filter.unique.precluster.ab
und.pick.pick.an.unique_list.list,
count=combined_seqs.unique.good.filter.unique.precluster.abund.uchime.p
ick.pick.count_table,
taxonomy=combined_seqs.unique.good.filter.unique.precluster.abund.pick.
nr_v119.wang.pick.taxonomy, label=0.03)
```

```
##Outputs:
###combined_seqs.unique.good.filter.unique.precluster.abund.pick.pick.a
n.unique_list.0.03.cons.tax.summary
###combined_seqs.unique.good.filter.unique.precluster.abund.pick.pick.a
n.unique_list.0.03.cons.taxonomy
```

```
###*****Analyses*****
```

```
#First steps: I transformed the names for simpler ones.
system(mv
combined_seqs.unique.good.filter.unique.precluster.abund.pick.pick.an.u
nique_list.shared 16S_3rdtry.an.shared)
system(mv
stability.trim.contigs.good.unique.good.filter.unique.precluster.pick.p
ick.pick.an.unique_list.0.03.cons.taxonomy 16S_3rdtry.an.cons.taxonomy)
```

```
#We now want to do is see how many sequences we have in each sample.
We'll do this with the count.groups command:
count.groups(shared=16S_3rdtry.an.shared)
```

```
##Output:
###count.summary
```

```

#We see that our smallest sample had 769 sequences in it. That is a
#reasonable number. Despite what some say, subsampling and rarefying
#your data is an important thing to do. We'll generate a subsampled
#file for our analyses with the sub.sample command:

sub.sample(shared=16S_3rdtry.an.shared, size=769)
#Sampling 769 from each group.
#0.03

##Output:
###16S_3rdtry.an.0.03.subsample.shared

##### OTU-based: alpha diversity#####
#Let's start our analysis by analyzing the alpha diversity of the
#samples. First we will generate collector's curve of the
#Chao1 richness estimators and the inverse Simpson diversity index. To
#do this we will use the collect.single command:

collect.single(shared=16S_3rdtry.an.shared, calc=chao-invsimpson,
freq=100)
##Outputs:
###16S_3rdtry.an.NS6.invsimpson ***We have these file for each sample
###
# We'll do this with the rarefaction.single command:

rarefaction.single(shared=16S_3rdtry.an.shared, calc=sobs, freq=100,
processors=4)
##Output:
###16S_3rdtry.an.groups.rarefaction

#Finally, let's get a table containing the number of sequences, the
#sample coverage, the number of observed OTUs, and the Inverse Simpson
#diversity estimate using the summary.single command. To standardize
#everything, let's randomly select 2441 sequences from each sample 1000
#times and calculate the average (note: that if we set subsample=T,
#then it would use the size of the smallest library):

summary.single(shared=16S_3rdtry.an.shared, calc=nseqs-coverage-sobs-
invsimpson, subsample=769)
##Outputs:
###16S_3rdtry.an.groups.ave-std.summary
###16S_3rdtry.an.groups.summary

##### OTU-based: beta diversity

dist.shared(shared=16S_3rdtry.an.shared, calc=thetayc-jclass,
subsample=769, processors=4)

##Outputs:
combined_seqs.an.thetayc.unique.lt.dist
#16S_3rdtry.an.thetayc.0.03.lt.dist
#16S_3rdtry.an.jclass.0.03.lt.dist
#16S_3rdtry.an.thetayc.0.03.lt.ave.dist
#16S_3rdtry.an.thetayc.0.03.lt.std.dist

```

```
##16S_3rdtry.an.jclass.0.03.lt.ave.dist
##16S_3rdtry.an.jclass.0.03.lt.std.dist

amova (phylip=16S_3rdtry.an.thetayc.0.03.lt.ave.dist,
design=combined_seqs_essai2.design)

#Output:
###16S_3rdtry.an.thetayc.0.03.lt.ave.amova
```
